# Supplementary material
Source: PubMed Central journal article supplement (PMC3276844)

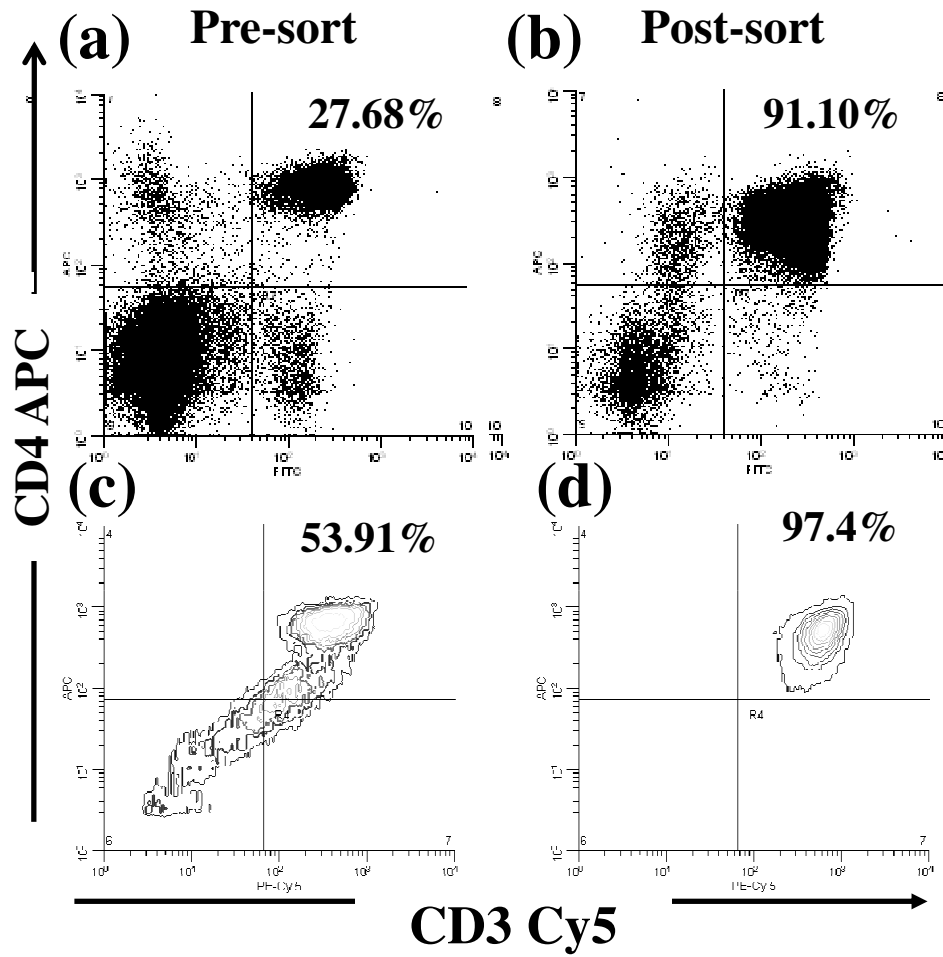

Supplementary Figure 2 Wythe *et al.*

Supplement: NIHMS40428-supplement-3.pdf [file NIHMS40428-supplement-3.pdf]

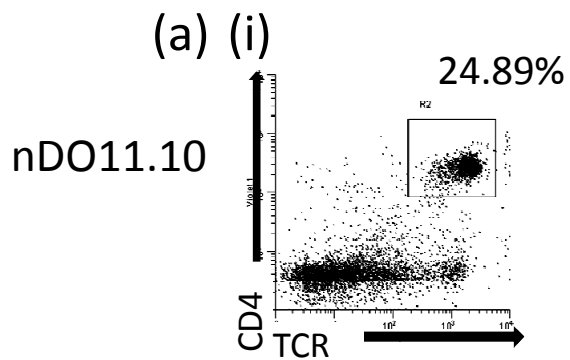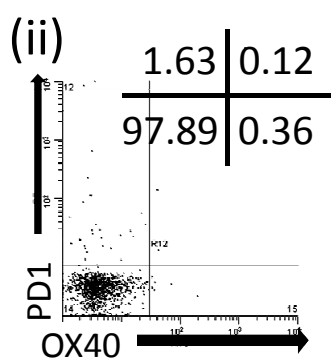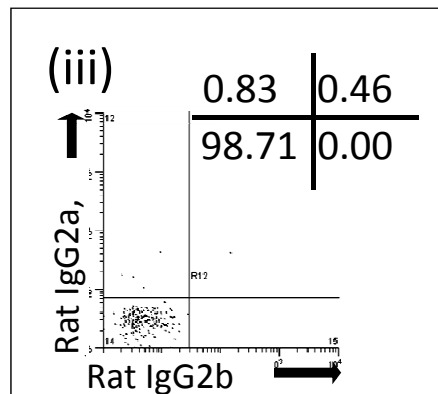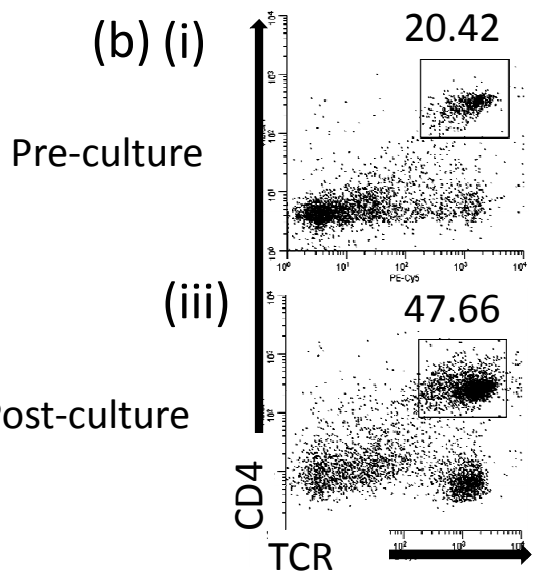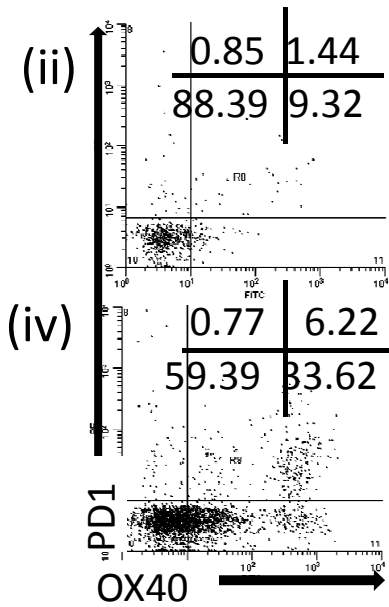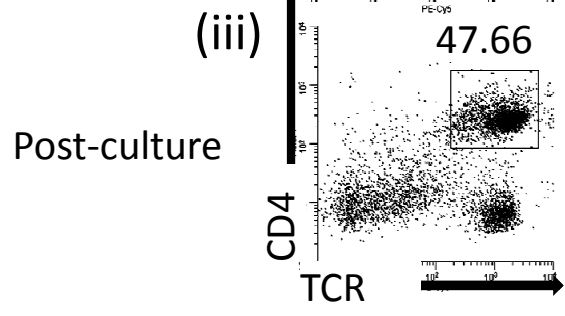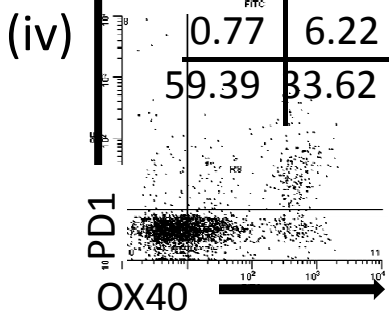

Supplementary Figure 3 Wythe *et al.*

Supplement: NIHMS40428-supplement-4.pdf [file NIHMS40428-supplement-4.pdf]
